# Supplementary material
Source: Springer Nature journal article supplement (https://www.springermedizin.de/resource/supplementary/12884_2012_730_MOESM3_ESM.pdf/9458564)

■ Strongly agree    
 ■ Agree    
 ■ Neither agree or disagree    
 ■ Disagree    
 ■ Strongly disagree

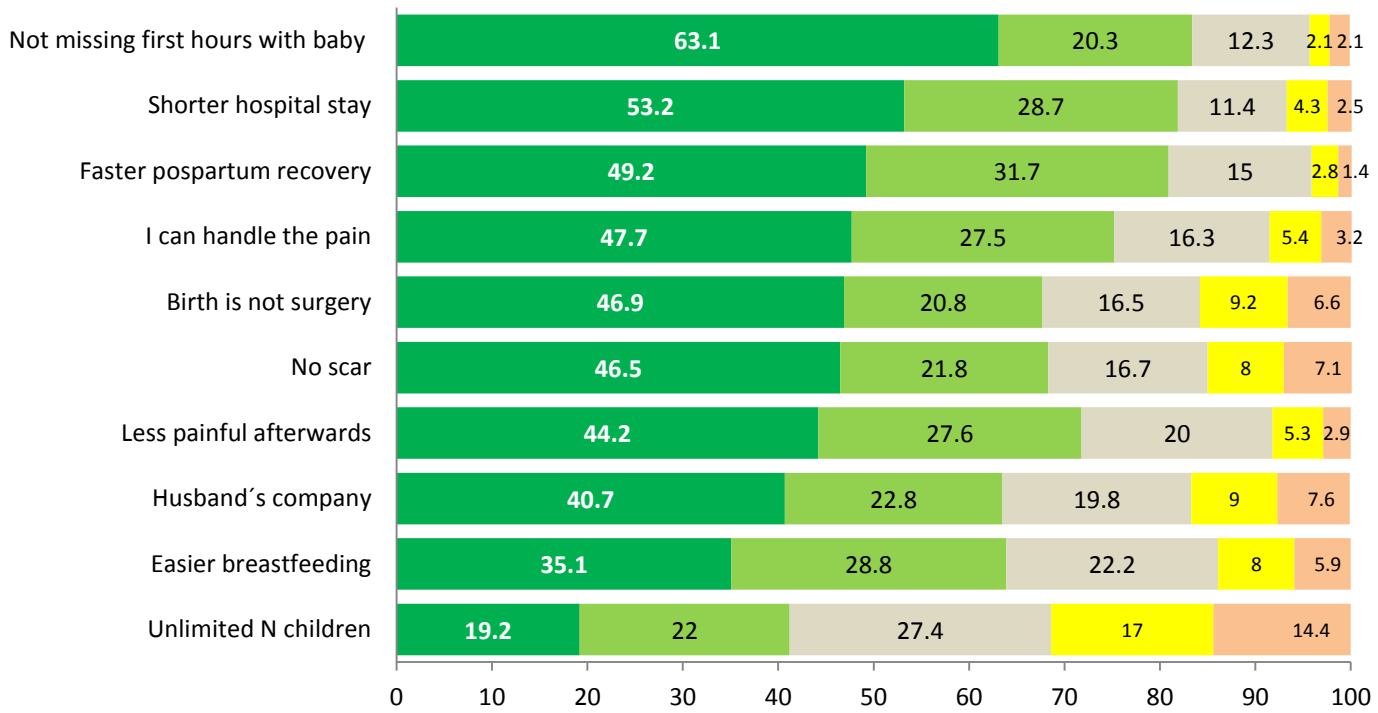

Supplement: MOESM3 [file 9458564]
